# Supplementary material for: IGK with conserved IGKV/IGKJ repertoire is expressed in acute myeloid leukemia and promotes leukemic cell migration
Source: PubMed Central journal article supplement (PMC4770757; doi:10.18632/oncotarget.5393), 2015-09-29
Supplement: oncotarget-06-39062-s001.pdf [file oncotarget-06-39062-s001.pdf]

## SUPPLEMENTARY MATERIALS AND METHODS

### CONSTRUCTION OF EXPRESSION VECTOR AND TRANSFECTION

IGKV1-5\*03/IGKJ3\*01 full length sequence (with C region) with 10 mutations found in AML patients were cloned into the pcDNA3.1 myc-His (-) B vector (Invitrogen) using the primer sets BamHI- IGKV1-5\*03 (5'-GGATCCATGGTGTTCAGACCCAGGTCTT-3') and IGKJ3\*01-HindIII (5'-AAGCTTCCACACTCTCCCCTGTTGAAGCTC T-3'). For overexpression of IGK, the plasmid containing IGKV1-5\*03/IGKJ3\*01 sequence was transfected into HL-60 and NB4 cell lines by electroporation according to the manufacturer's instructions (Nucleofector 2b Device, Lonza, Switzerland).

### KNOCKDOWN OF IGK EXPRESSION BY SIRNA

siRNAs that target IGK C region sequence and non-specific siRNA (siNC, used as a negative control) were synthesized by Shanghai GenePharma Company (Shanghai, China). The sequences were as follows: siRNA-1, 5'-UCACAGAGCAGGACAGCAA-3'; siRNA-2, 5'-AGGCCAAAGUACAGUGGAA-3'; and siNC, 5'-GUAUGACAACAGCCUCAAGTT-3'. For knockdown of IGK expression, siRNA or siNC was transfected into HL-60 and NB4 cell lines by electroporation according to the manufacturer's instructions (Nucleofector 2b Device).

**A** IGKV1-5\*03/IGKJ3\*01  
 <---FWR1--><CDR1><-----FWR2-----><C><-----FWR3-----><-CDR3><---JK3--->  
 Germline GDRVITICRASQSISSWLAWYQQKPGKAPKLLIYKASSLESGVPSRFRSGSGSGTEFTLTISLQPDDEFATYYCQQYNSWIFTFGPGTKVDIK  
 Patient 1 ..K.I.S.....D.....M..V.T.Q.....ST.....  
 Patient 2 ..K.I.S.....D.....M..V.T.Q.....ST.....  
 Patient 3 ..K.I.S.....D.....M..V.T.Q.....ST.....  
 Patient 4 ..K.I.S.....D.....M..V.T.Q.....ST.....  
 Patient 5 ..K.I.S.....D.....M..V.T.Q.....ST.....  
 Patient 6 ..K.I.S.....D...L.....M..V.T.Q.....ST.....  
 Patient 7 ..K.I.S.....D.....M..V.T.Q.....ST.....  
 Patient 8 ..R.I.SR.....D.....M..V.T.Q.....ST.....

**B** IGKV1-NL1\*01/IGKJ5\*01  
 <---FWR1--><CDR1><-----FWR2-----><C><-----FWR3-----><-CDR3><---JK5--->  
 Germline GDRVITICRASQGISNSLAWYQQKPGKAPKLLLYAASRLESGVPSRFRSGSGSGTDYTLTISLQPEDFATYYCQQYYSTPITFGQGRLEIK  
 Patient 1 .....D..T.V...HR.....G.....N.....A.....H.....  
 Patient 2 .....D..T.V...HR.....G.....N.....A.....H.....  
 Patient 3 .....D..T.V...HR.....G.....N.....A.....H.....  
 HEL .....D..T.V...HR.....G.....N.....A.....H.....  
 NB4 .....D..T.V...HR.....G.....N.....A.....H.....  
 KG-1 .....D..T.V...HR.....G.....N.....A.....H.....

**Supplementary Figure S1: Alignment of IGK sequences with IGKV1-5\*03/IGKJ3\*01 and IGKV1-NL1\*01/IGKJ5\*01 rearrangements from AML patients and AML cell lines and the germline sequence.**

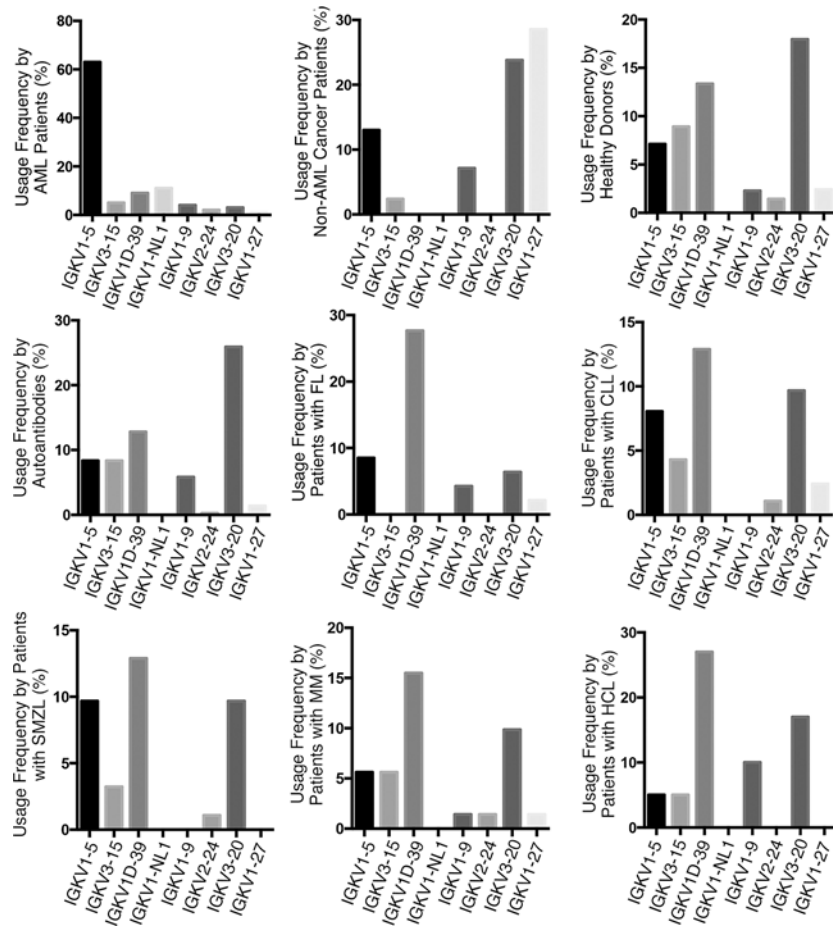

**Supplementary Figure S2: Comparison of IGKV usage frequency among patients with acute myeloid leukemia (AML), non-hematopoietic neoplasms (non-AML), autoimmune disease, follicular lymphoma (FL), chronic lymphocytic leukemia (CLL), splenic marginal zone lymphoma (SMZL), multiple myeloma (MM), hairy cell leukemia (HCL), and healthy donors.**
